# Supplementary material
Source: publisher figshare collection journal article supplement (https://acs.figshare.com/ndownloader/files/15509021)
Supplement: Supplementary file 1 [file 15509021]

# Two-step Carbothermal Welding to Access Atomically Dispersed Pd<sub>1</sub> on 3D Zirconia Nanonet for Direct Indole Synthesis

Yafei Zhao,<sup>1,†</sup> Huang Zhou,<sup>1,†</sup> Wenxing Chen,<sup>3,†</sup> Yujing Tong,<sup>1</sup> Chao Zhao,<sup>1</sup> Yue Lin,<sup>1</sup> Zheng Jiang,<sup>5</sup> Qingwei Zhang,<sup>1</sup> Zhenggang Xue,<sup>1</sup> Weng-Chon Cheong,<sup>2</sup> Benjin Jin,<sup>1</sup> Fangyao Zhou,<sup>1</sup> Wenyu Wang,<sup>1</sup> Min Chen,<sup>1</sup> Xun Hong,<sup>1</sup> Juncai Dong,<sup>4</sup> Shiqiang Wei,<sup>6</sup> Yadong Li<sup>2</sup>, Yuen Wu<sup>1,\*</sup>

<sup>1</sup>Department of Chemistry, Hefei National Laboratory for Physical Sciences at the Microscale, iChEM (Collaborative Innovation Center of Chemistry for Energy Materials), University of Science and Technology of China, Hefei 230026, China;

<sup>2</sup>Department of Chemistry, Tsinghua University, Beijing 100084, PR. China;

<sup>3</sup>Beijing Key Laboratory of Construction Tailorable Advanced Functional Materials and Green Applications, School of Materials Science and Engineering, Beijing Institute of Technology, Beijing 100081, P. R. China.

<sup>4</sup>Institute of Physics, Chinese Academy of Sciences, Beijing 100190, P. R. China.

<sup>5</sup>Shanghai Synchrotron Radiation Facilities, Shanghai Institute of Applied Physics, Shanghai 201800, P. R. China.

<sup>6</sup>National Synchrotron Radiation Laboratory, University of Science and Technology of China, Hefei 230026, China;

## Table of contents

1. Experiment detail
2. Supplementary Figures and Tables
3. References

## Section1. Experiment detail

### Materials

All chemicals were used as received without further purification. 2-amino terephthalic acid ( $\text{H}_2\text{BDC-NH}_2$ ), zirconium chloride ( $\text{ZrCl}_4$ ), hydrofluoric acid solution (HF 40%) were purchased by Shanghai Chemical Reagents. Palladium chloride, acetic acid, 2-(2-nitrophenyl)acetaldehyde, commercial  $\text{ZrO}_2$  and DMF were purchased from Aladdin Company. Deionized water was used throughout this study.

### Preparation of UiO-66-NH<sub>2</sub>

In a typical procedure,<sup>[1-3]</sup> a mixture of  $\text{ZrCl}_4$  (315 mg) and  $\text{H}_2\text{BDC-NH}_2$  (245 mg) was dissolved in 300 mL DMF containing 40 mL of HAc in a 500 mL round-bottom flask. The mixture was treated with ultrasound for 0.5 h to form a homogeneous transparent solution. Then, the mixture was heated at 120 °C for 3 h before it cooled to room temperature. The as-obtained products were centrifuged at 7000 rpm for 3 min and washed with methanol and DMF (1/4 v/v) for three times. Finally, the as-prepared UiO-66-NH<sub>2</sub> was dried under vacuum at 65 °C for further use.

### Preparation of PdCl<sub>2</sub>/UiO-66-NH<sub>2</sub>

First, the Pd precursor ( $\text{PdCl}_2$ ) was adsorbed through the unsaturated dangling -NH<sub>2</sub> groups by wet impregnation. Briefly, a mixed precursor of  $\text{ZrCl}_4$  (315 mg) and  $\text{PdCl}_2/\text{H}_2\text{BDC-NH}_2$  (5.6 mg/245 mg) was dissolved in 300 mL of DMF containing 36 mL of glacial acetic acid in a 500 mL round-bottom flask. The mixture was treated with ultrasound for 0.5 h to form a homogeneous transparent solution. Then, the mixture was heated at 120 °C for 3 h before it cooled to room temperature. The as-obtained products were centrifuged at 7000 rpm for 3 min and washed with methanol and DMF (1/4 v/v) for three times. Finally, the as-prepared  $\text{PdCl}_2/\text{UiO-66-NH}_2$  was dried in vacuum at 65 °C for overnight.

### Preparation of Pd<sub>1</sub>@NC/ZrO<sub>2</sub>

The as-prepared  $\text{PdCl}_2/\text{UiO-66-NH}_2$  (100 mg) was placed in a tube furnace and then heated to 900 °C at a heating rate of 5 °C/min under a flowing argon atmosphere. It was followed by another 3 h treatment at 900 °C under argon atmosphere. After cooling to room temperature,

the black powder was collected for future use.

#### **Preparation of Pd<sub>1</sub>@ZrO<sub>2</sub> and U-ZrO<sub>2</sub>**

The first, the as-prepared PdCl<sub>2</sub>/UiO-66-NH<sub>2</sub> (100 mg) was placed in a tube furnace and then heated to 900 °C for 3 h at a heating rate of 5 °C/min under a flowing argon atmosphere and then air atmosphere (600 °C) for 3 min to yield Pd<sub>1</sub>@ZrO<sub>2</sub>. The synthetic procedure of U-ZrO<sub>2</sub> was same as that of Pd<sub>1</sub>@ZrO<sub>2</sub>, except for using UiO-66-NH<sub>2</sub> instead of PdCl<sub>2</sub>/UiO-66-NH<sub>2</sub>.

#### **Preparation of Pd<sub>1</sub>@NC**

The black powder of Pd<sub>1</sub>@CN/ZrO<sub>2</sub> was dispersed in 15 mL of H<sub>2</sub>O containing 0.1 mol HF for 2 h, and then centrifuged at 11000 rpm for 5 min. Subsequently, the resultant product was washed with methanol and H<sub>2</sub>O (v/v 1:4) for three times and dried under vacuum at 65 °C for further use.

#### **Characterization**

Powder X-ray diffraction (XRD) measurements were recorded on a Rigaku Miniflex-600 operated at 40 kV voltage and 15 mA current using a Cu K $\alpha$  radiation ( $\lambda=0.15406$  nm) at a step width of 8°/min. TEM images were recorded on a Hitachi-7650 worked at 100 kV. The high-resolution TEM, HAADF-STEM images and the corresponding Electron energy-loss spectroscopy were recorded on a FEI Tecnai G2 F20 S-Twin high-resolution transmission electron microscope worked at 200 kV and a JEOL JEM-ARM200F TEM/STEM with a spherical aberration corrector worked at 300 kV. Through-focal HAADF series were acquired at nanometer intervals, with the first image under-focused (beyond the beam exit surface) and the final image over-focused (before the beam entrance surface). The images were then manually aligned to remove the sample drift effects. Elemental analysis of Pd in the solid samples was detected by inductively coupled plasma atomic emission spectrometry (Optima 7300 DV). Hard XAFS measurement and data analysis: XAFS spectra at the Pd and Fe K-edge were recorded at the XAS station (BL14W1) of the Shanghai Synchrotron Radiation Facility (SSRF), China. The Pd and Fe K-edge XANES data were recorded in a fluorescence mode. The storage ring worked at the energy of 3.5 GeV. The hard X-ray was monochromatized with Si (111) double-crystals. The acquired EXAFS data were extracted and processed according to the standard procedures using the ATHENA module implemented in the IFEFFIT software packages. The k<sup>3</sup>-weighted EXAFS spectra were obtained by subtracting the post-edge background from the overall absorption and then normalizing with respect to the edge-jump step. Subsequently, k<sup>3</sup>-weighted  $\chi(k)$  data in the k-space were Fourier

transformed to real (R) space using a hanning windows ( $d_k=3.00-12.173 \text{ \AA}^{-1}$ ) to separate the EXAFS contributions from different coordination shells. To obtain the quantitative structural parameters around central atoms, least-squares curve parameter fitting was performed using the ARTEMIS module of IFEFFIT software packages. The following EXAFS equation was used.

$$\chi(k) = \sum_j \frac{N_j S_o^2 F_j(k)}{k R_j^2} \exp[-2 k^2 \sigma_j^2] \exp\left[-\frac{2 R_j}{\lambda(k)}\right] \sin[2k R_j + \phi_j(k)]$$

$S_o^2$  is the amplitude reduction factor,  $F_j(k)$  is the effective curved-wave back scattering amplitude,  $N_j$  is the number of neighbors in the  $j$  th atomic shell,  $R_j$  is the distance between the X-ray absorbing central atom and the atoms in the  $j$ th atomic shell (back scatterer),  $\lambda$  is the mean free path in  $\text{\AA}$ ,  $\phi_j(k)$  is the phase shift (including the phase shift for each shell and the total central atom phase shift),  $\sigma_j$  is the Debye-Waller parameter of the  $j$ th atomic shell (variation of distances around the average  $R_j$ ). The functions  $F_j(k)$ ,  $\lambda$  and  $\phi_j(k)$  were calculated with the ab initio code FEFF8.2.

#### Catalytic evaluation

The reactions were operated with the 25 mL Schlenk glass vessel tubes under 0.1 MPa  $H_2$  atmosphere. In a typical experiment, the reaction solutions of 0.005 mmol of 2-(2-Nitrophenyl)acetaldehyde, 2 mL of DMF and different catalysts ( $Pd_1@ZrO_2$ , U- $ZrO_2$ ,  $Pd_1@NC$ ) with a weight ratio of 1:1000 (catalyst: reactant) were loaded into the reactor. Then, the reactor was heated to the 80 °C temperature and the stirring speed fixed to 600 rpm to ensure that the diffusion effect was eliminated. Mesitylene (1 mmol) used as the internal standard was added in the beginning of the reaction. The product was identified by the gas chromatography–mass spectrometry (GC-MS, Thermo Fisher Scientific-TXQ Quntum XLS, column-TG-WAXMS, 30 m  $\times$  0.25 mm  $\times$  0.25  $\mu$ m), and was quantitatively analyzed by GC (Shimadzu, GC-2010 Plus), equipped with FID and a (30 m  $\times$  0.25 mm  $\times$  0.25  $\mu$ m) KB-WAX capillary column (Kromat Corporation, USA) using mesitylene as an internal standard.

## Section2. Supporting Figures and Tables

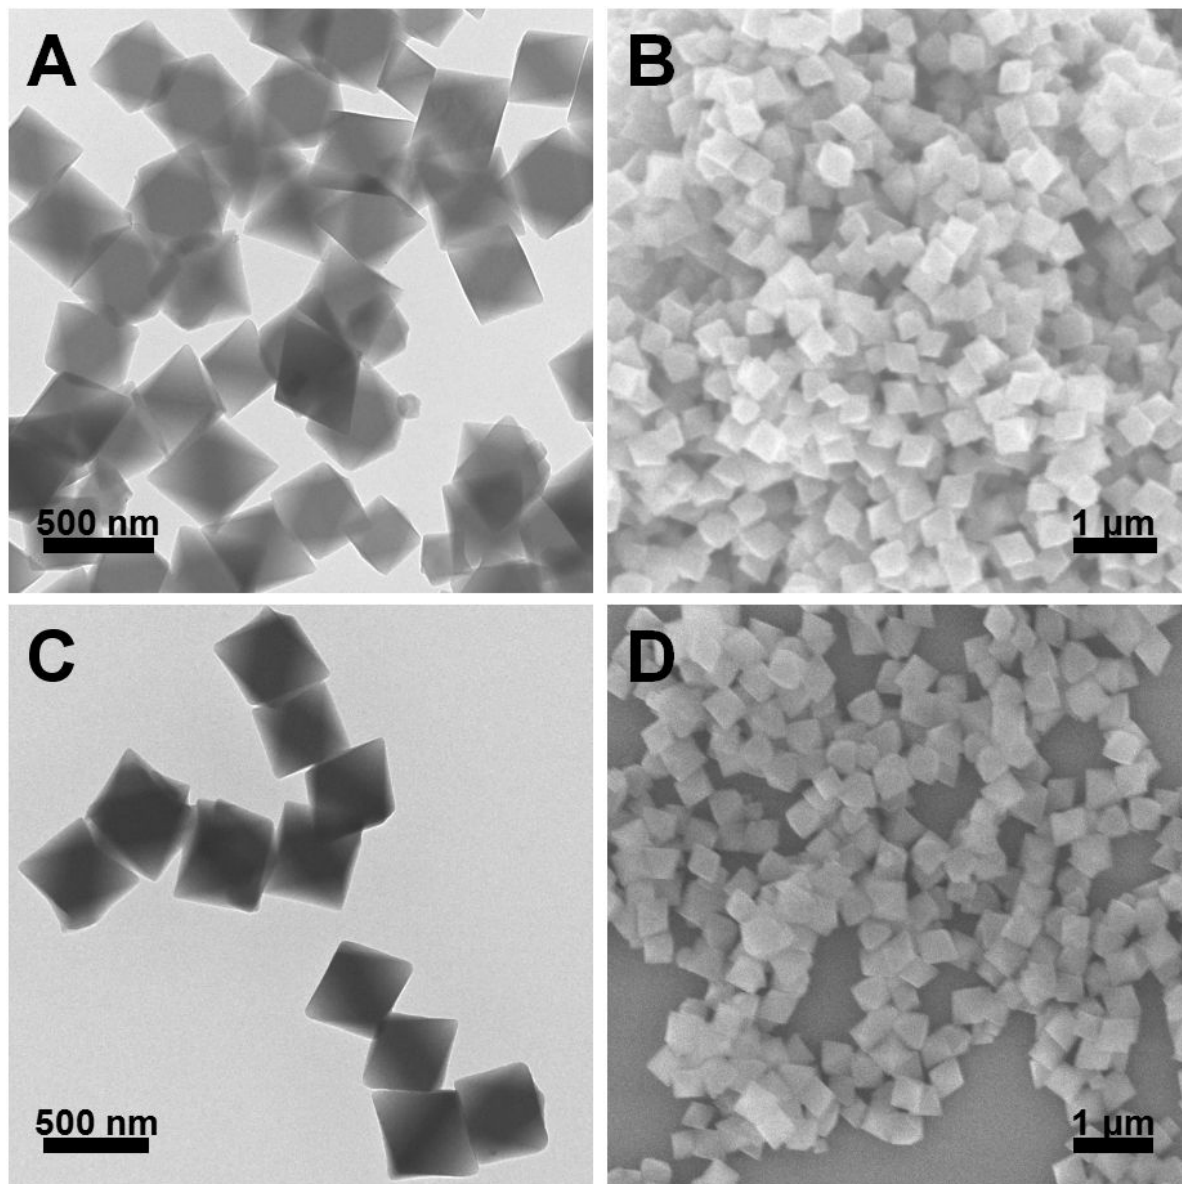

**Fig. S1.** TEM images of UiO-66-NH<sub>2</sub> (A) and PdCl<sub>2</sub>/UiO-66-NH<sub>2</sub> (C). SEM images of UiO-66-NH<sub>2</sub> (B) and PdCl<sub>2</sub>/UiO-66-NH<sub>2</sub> (D).

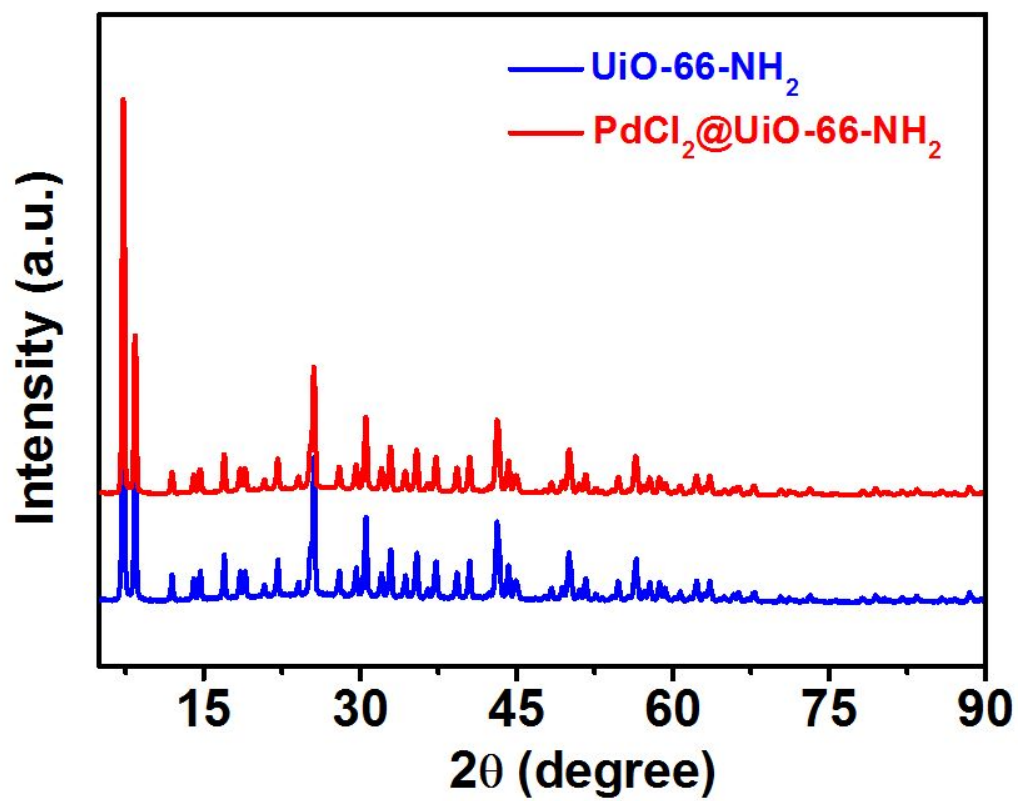

Fig. S2. XRD patterns of UiO-66-NH<sub>2</sub> and PdCl<sub>2</sub>@UiO-66-NH<sub>2</sub>.

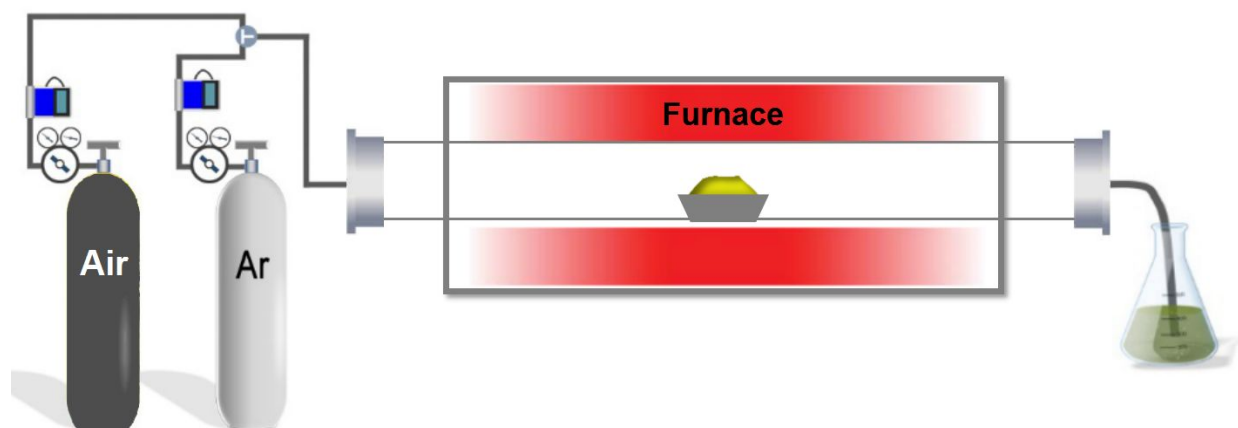

Fig. S3. Schematic illustration of a home-built tube furnace.

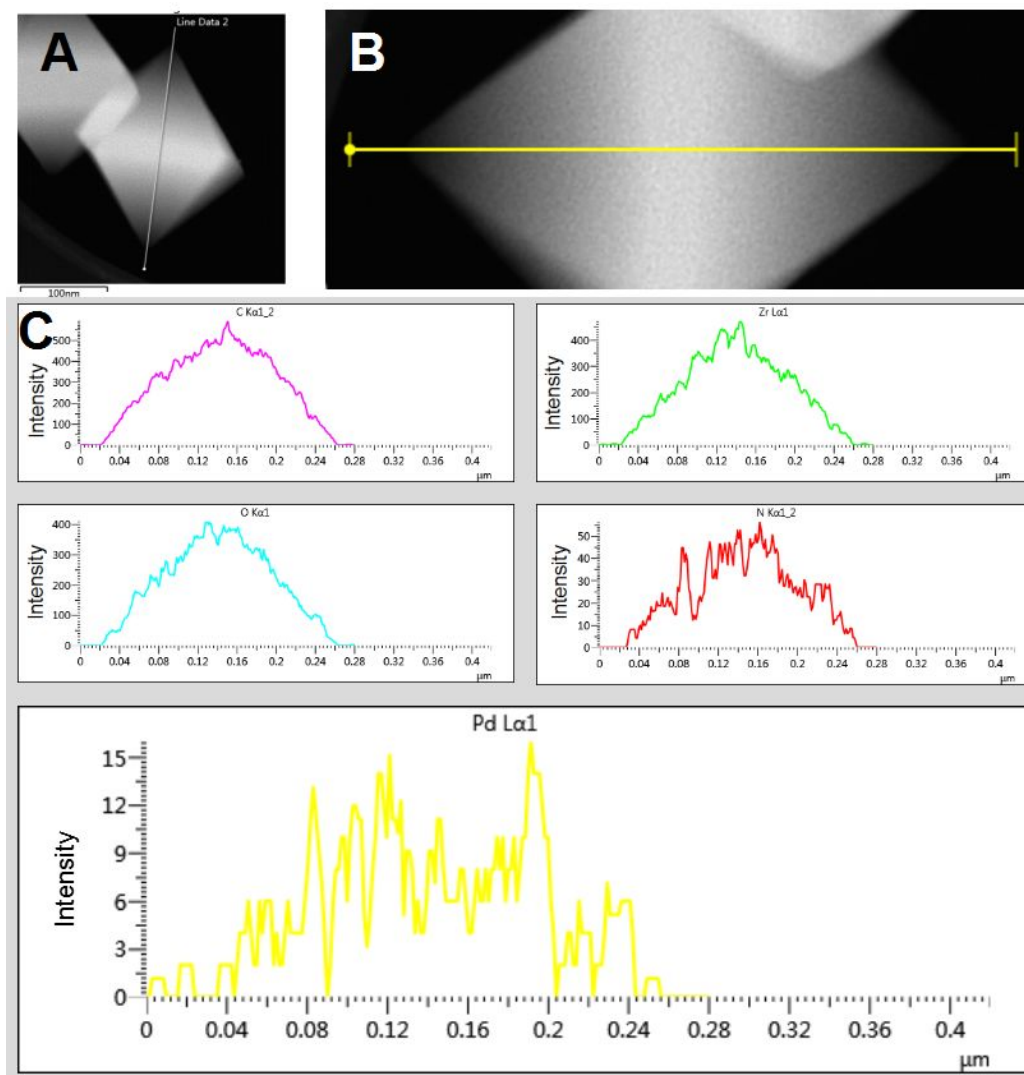

**Fig. S4.** Dark field image of  $\text{Pd}_1\text{@NC/ZrO}_2$  (A and B) and EDX spectroscopy line-scan profile, indicating C, Zr, O, N, Pd were homogeneously distributed in whole MOF skeletons (C).

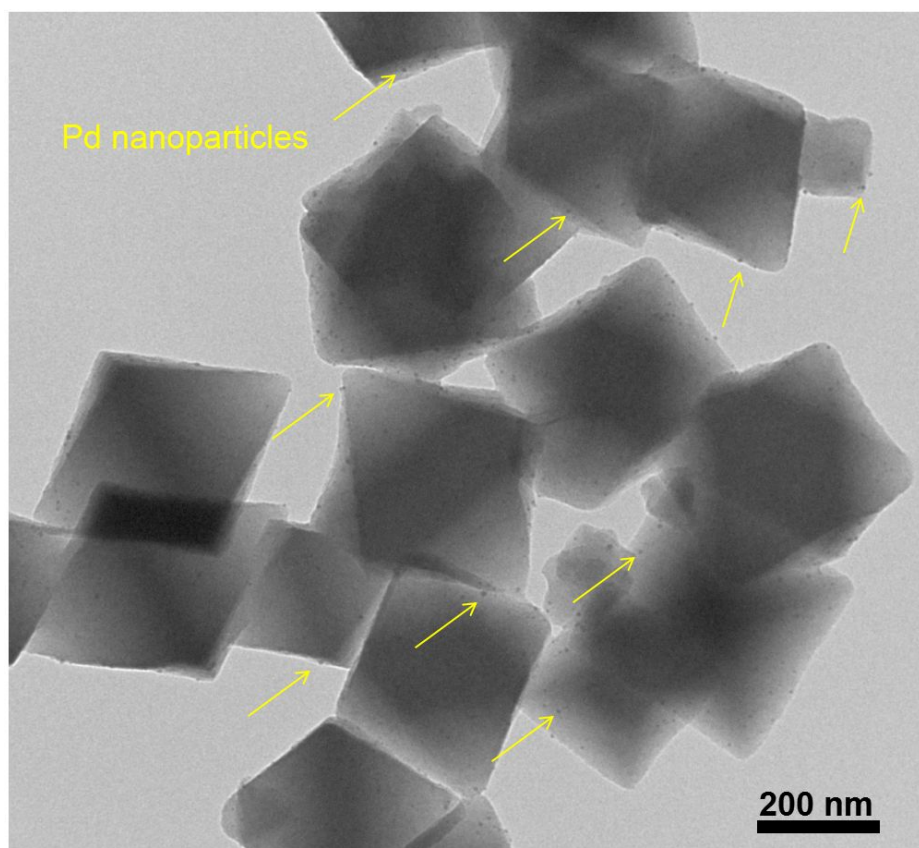

**Fig. S5.** The representative TEM image of Pd nanoparticles anchored onto the terephthalic-acid-derived carbon support through the pyrolysis of PdCl<sub>2</sub>@UiO-66 (PdCl<sub>2</sub>:H<sub>2</sub>BDC:ZrCl<sub>4</sub> = 5.6 mg : 227 mg: 315 mg). Without the assistance of -NH<sub>2</sub> groups, a large proportion of Pd atoms would aggregate at high temperature, resulting in the formation of Pd nanoparticles.



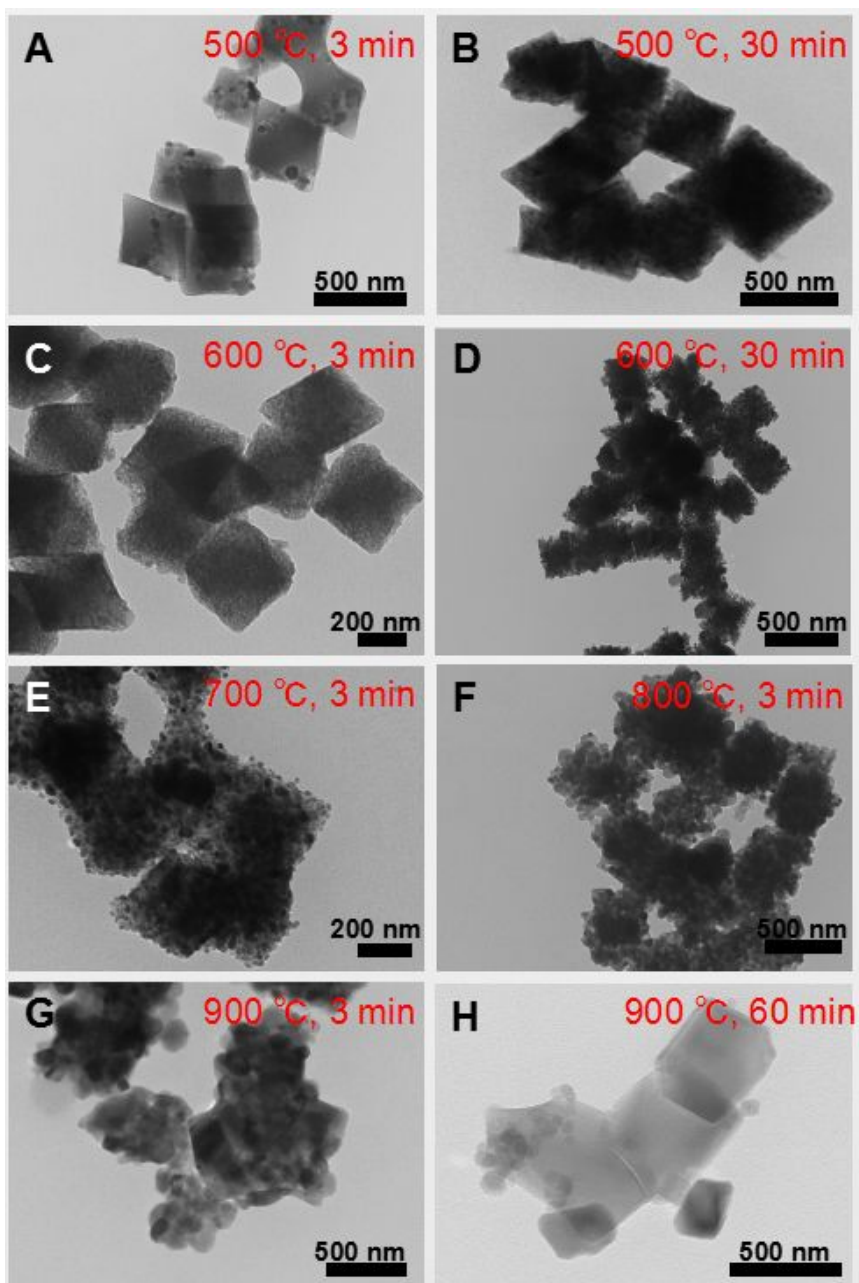

**Fig. S6.** NC removing process of  $\text{Pd}_1\text{@NC/ZrO}_2$  was treated under various temperature in air. The optimal temperature was give to 600 °C (3 min).

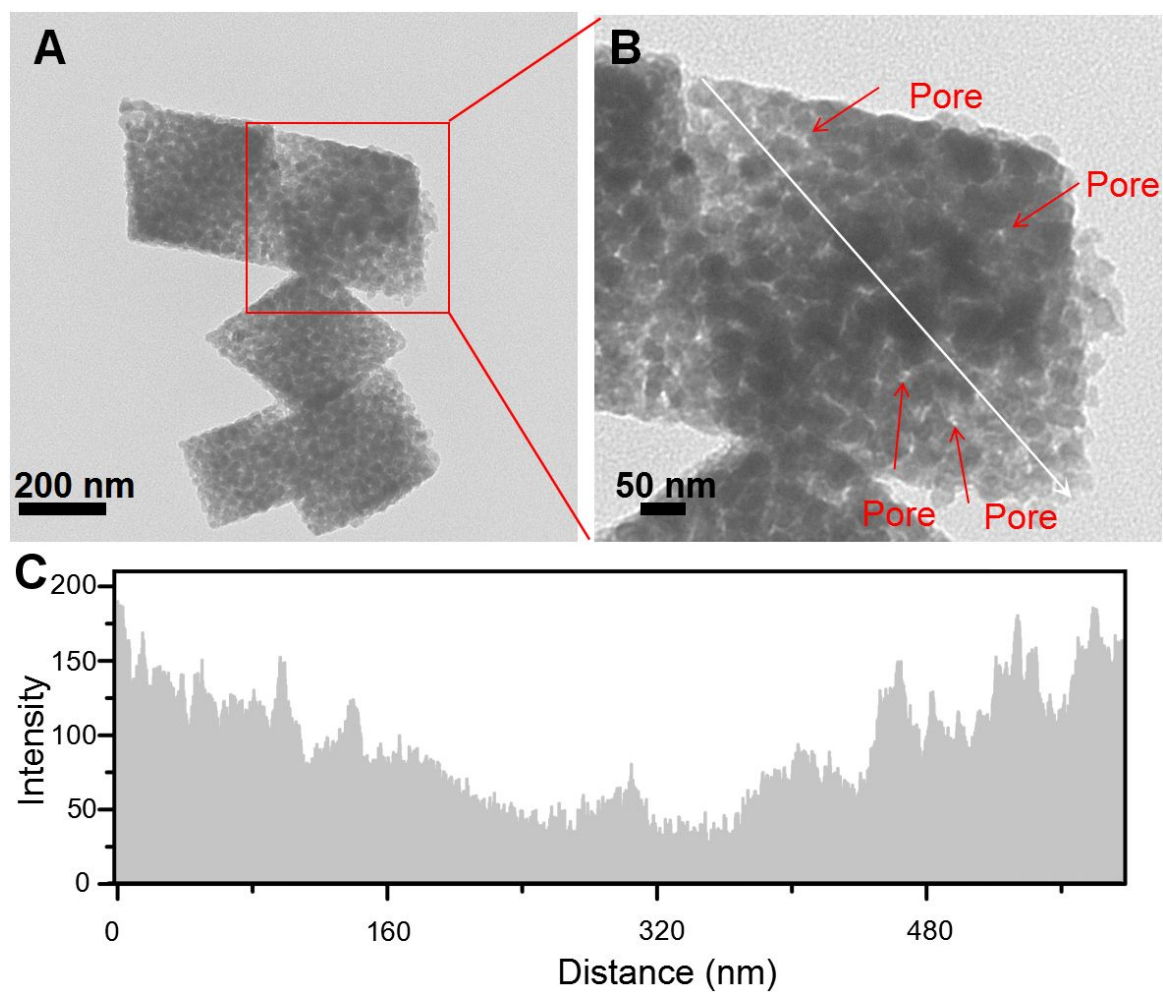

**Fig. S7.** TEM image (A) and its magnified image (B) of Pd<sub>1</sub>@ZrO<sub>2</sub>. (C) Corresponding intensity profiles obtained from the white line in (B), indicating the surface of ZrO<sub>2</sub> skeletons was more fluctuant and porous.

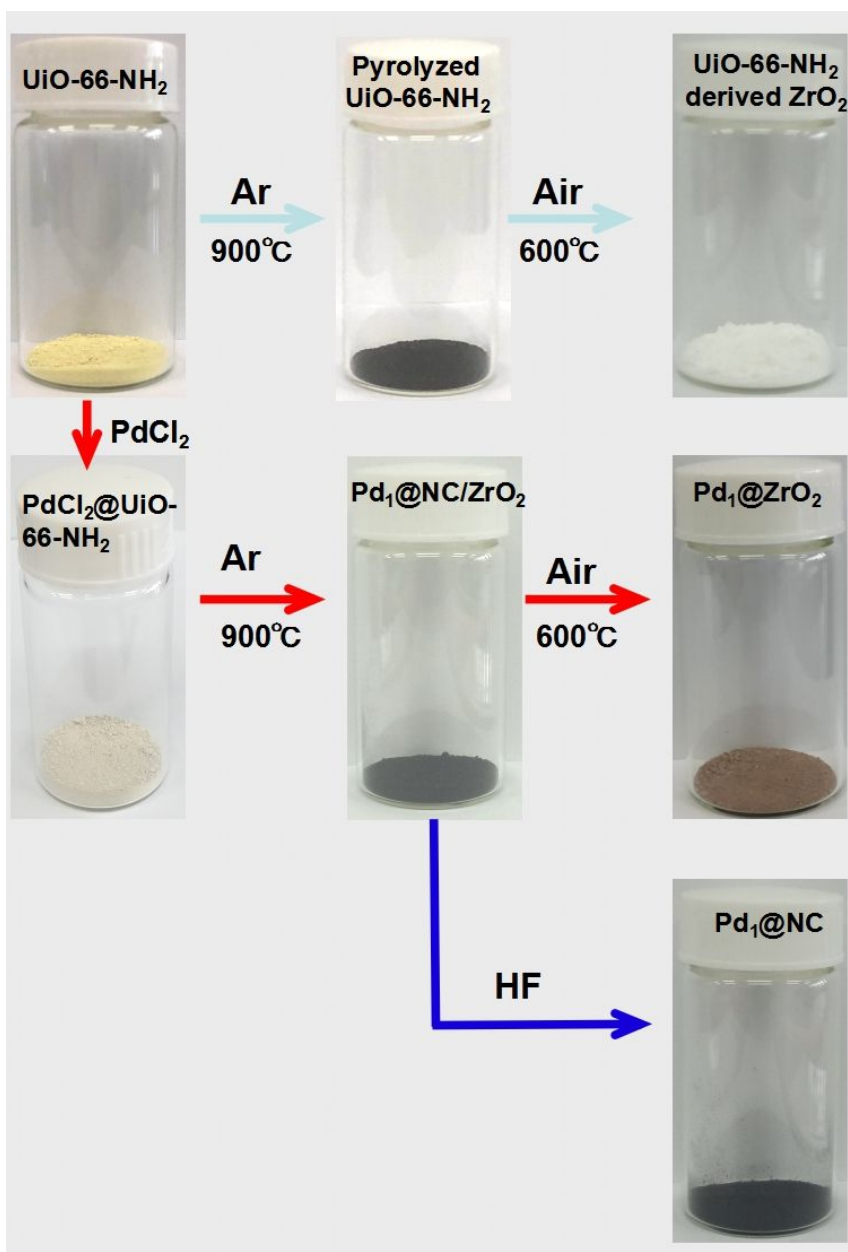

**Fig. S8.** The color evolution during the preparation of UiO-66-NH<sub>2</sub> derived ZrO<sub>2</sub>, Pd<sub>1</sub>@NC/ZrO<sub>2</sub>, Pd<sub>1</sub>@ZrO<sub>2</sub>, and Pd<sub>1</sub>@NC.

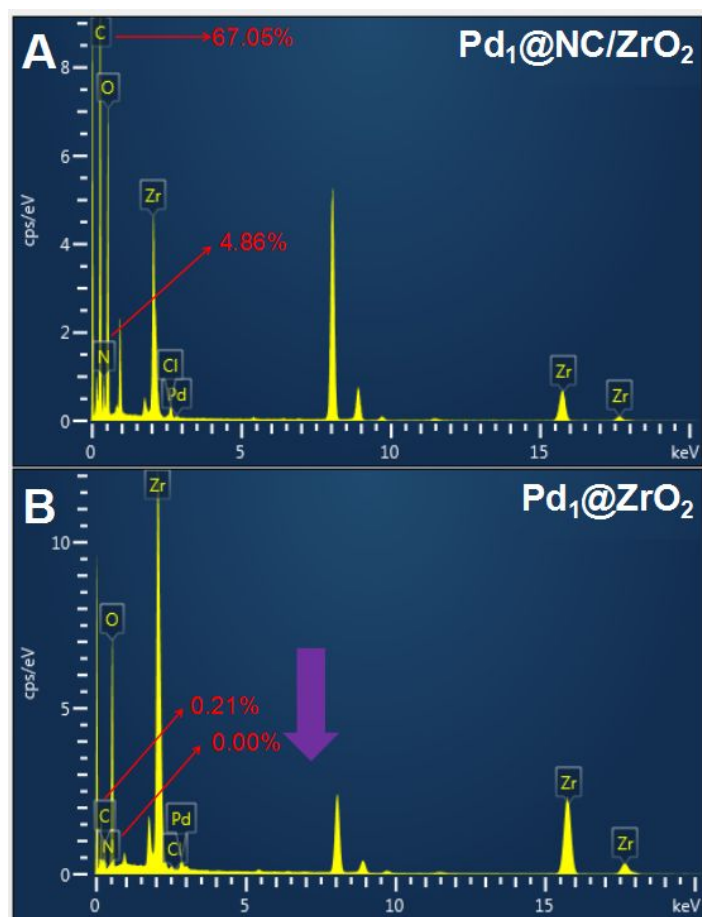

**Fig. S9.** EDS spectra of  $\text{Pd}_1@\text{NC}/\text{ZrO}_2$  (Figure 2F) and  $\text{Pd}_1@\text{ZrO}_2$  (Figure 2J).

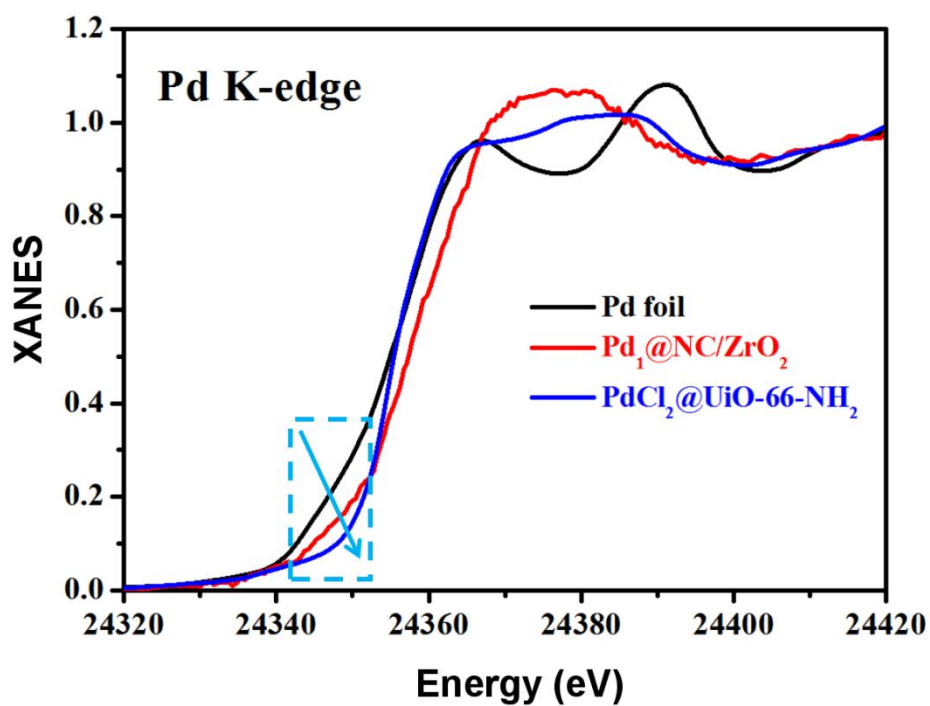

Fig. S10. XANES spectra of PdCl<sub>2</sub>@UiO-66-NH<sub>2</sub>, Pd<sub>1</sub>@NC/ZrO<sub>2</sub>, and Pd foil.

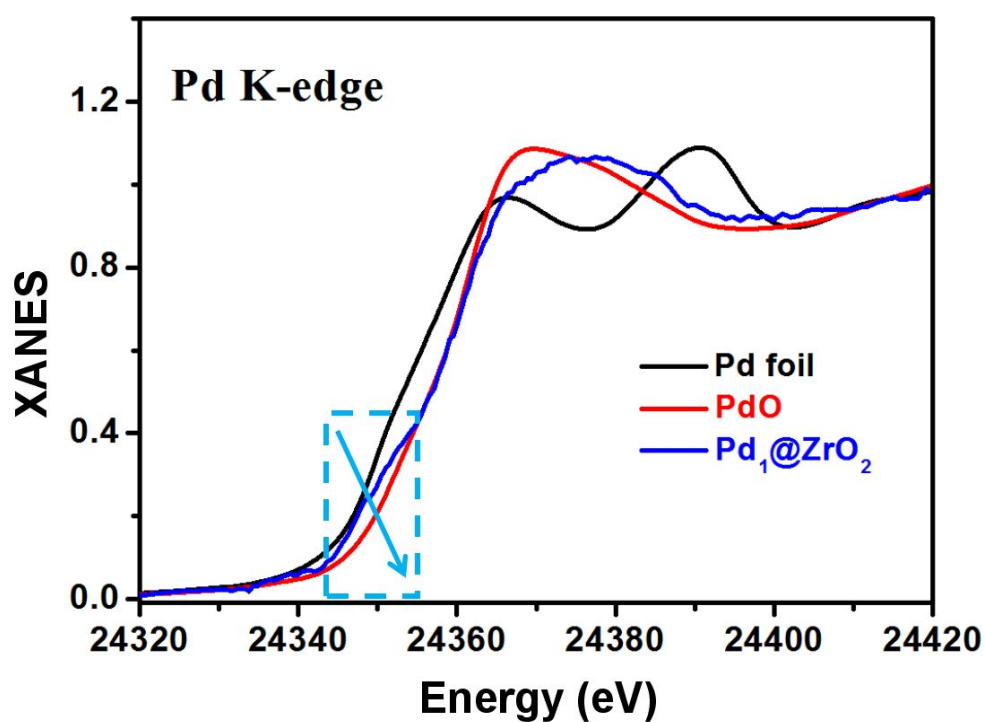

Fig. S11. XANES spectra of Pd<sub>1</sub>@ZrO<sub>2</sub>, PdO, and Pd foil.

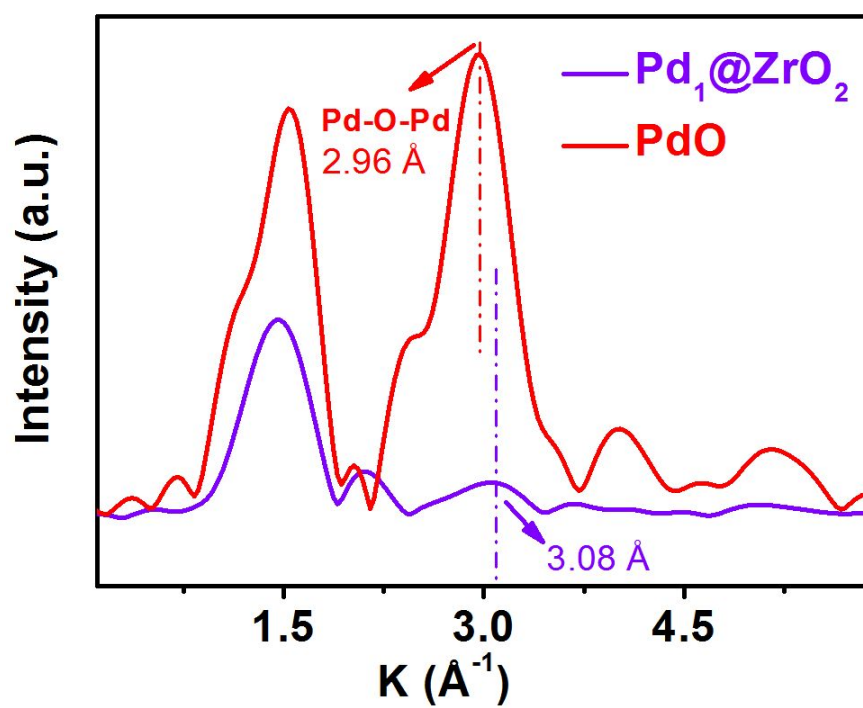

Fig. S12. FT-EXAFS of Pd<sub>1</sub>@ZrO<sub>2</sub> and PdO.

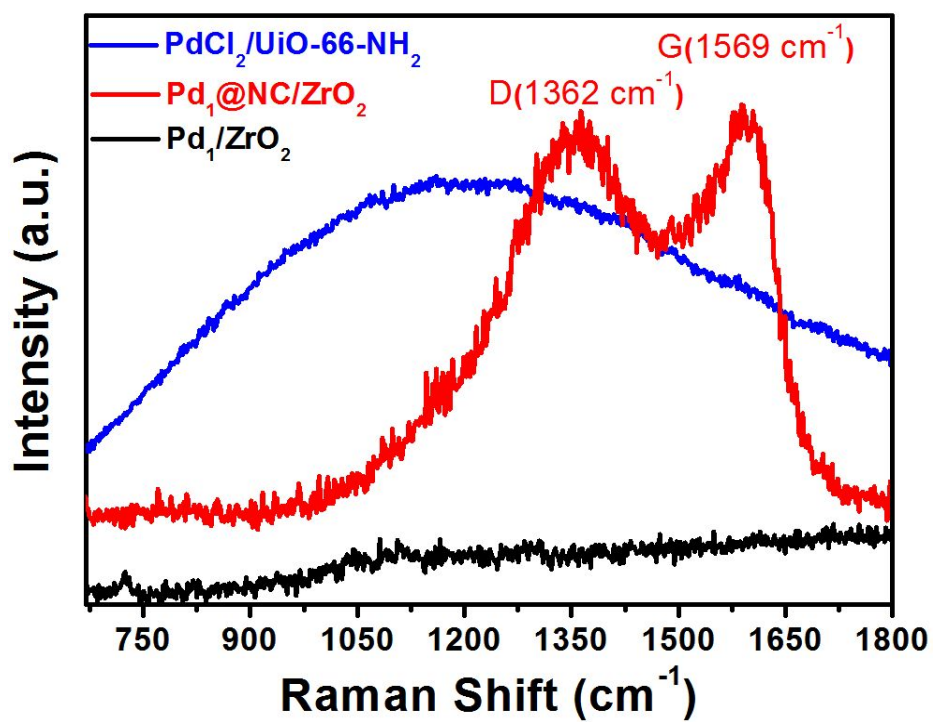

**Fig. S13.** Raman spectra of PdCl<sub>2</sub>@UiO-66-NH<sub>2</sub>, Pd<sub>1</sub>@NC/ZrO<sub>2</sub>, and Pd<sub>1</sub>@ZrO<sub>2</sub>.

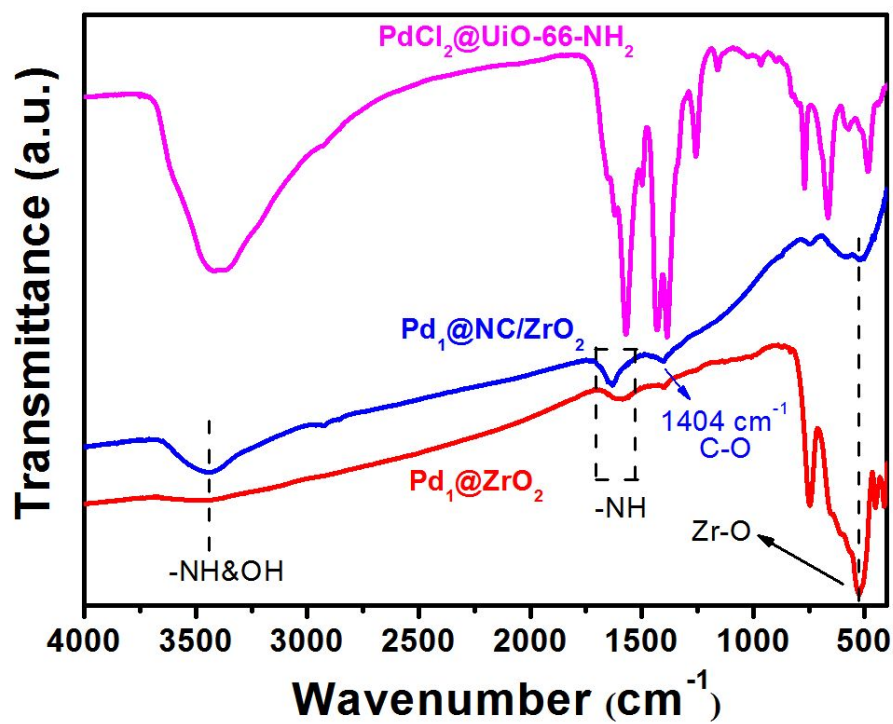

**Fig. S14.** FT-IR spectra of  $\text{PdCl}_2@\text{UiO-66-NH}_2$ ,  $\text{Pd}_1@\text{NC/ZrO}_2$ , and  $\text{Pd}_1@\text{ZrO}_2$ . The peak located at  $522 \text{ cm}^{-1}$  was assigned to Zr-O absorption band.<sup>[4]</sup>



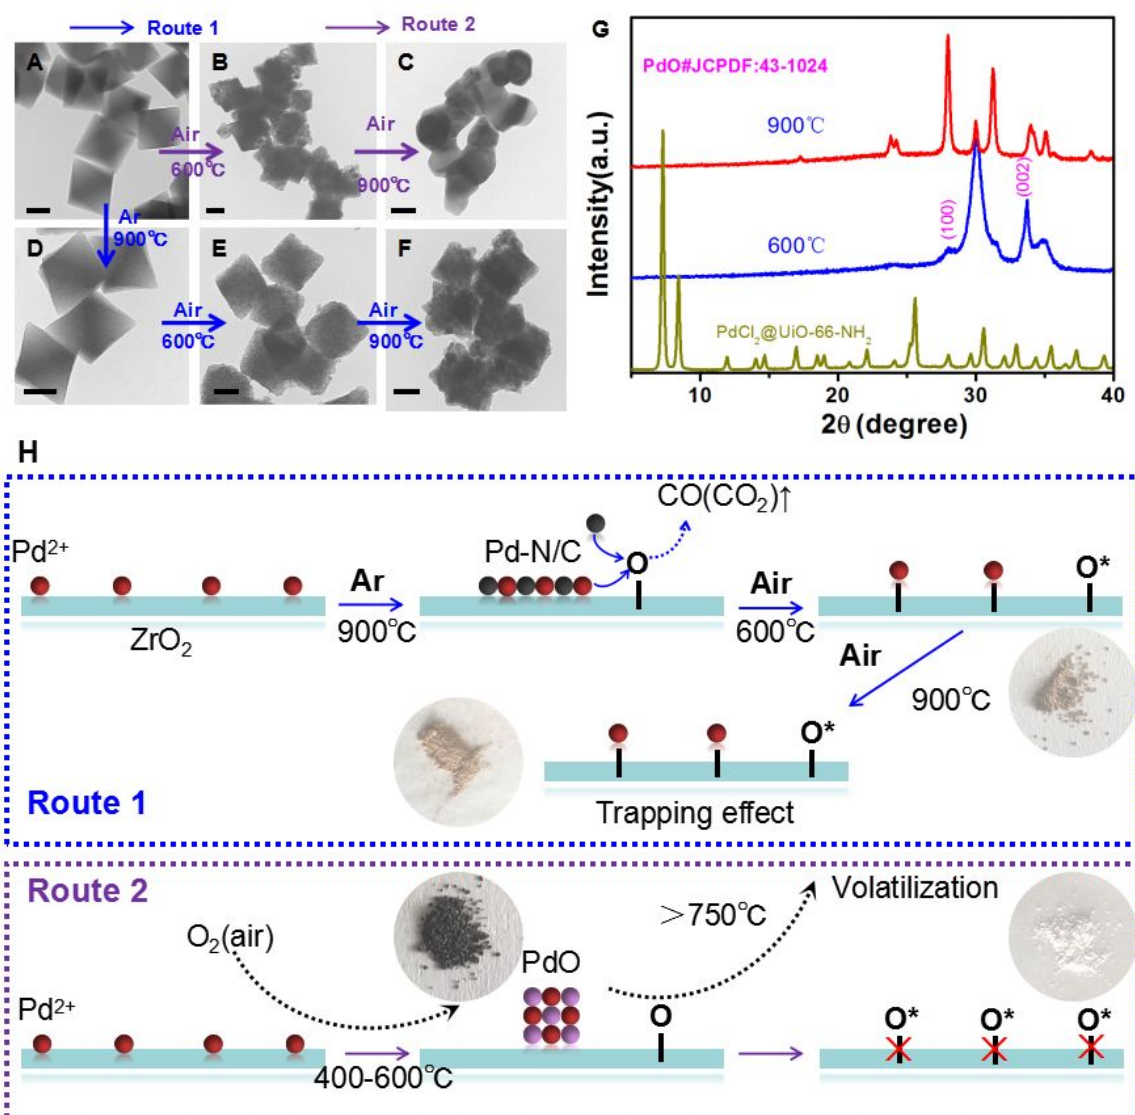

**Fig. S15.** (A-F) TEM images of  $\text{PdCl}_2@\text{UiO-66-NH}_2$  under various heat treatment. (Insets are the TEM images. The scale bars, 200 nm). (G) XRD patterns of  $\text{PdCl}_2@\text{UiO-66-NH}_2$  under pyrolysis in air. (H) The pyrolysis paths for the  $\text{PdCl}_2@\text{UiO-66-NH}_2$ .

The  $\text{PdCl}_2@\text{UiO-66-NH}_2$  (Route 2) was first pyrolyzed at 600 °C (3 min) in air. The adsorbent  $\text{Pd}^{2+}$  was bonded with  $\text{O}_2$  (derived from air) to yield  $\text{PdO}$  and 2-aminoterephthalate ligands were directly gasified in a lower temperature range (400-600 °C). No obvious chemical attachment between  $\text{PdO}$  and  $\text{ZrO}_2$  nodes was produced. At 900 °C in air, the surface  $\text{PdO}$  was evaporated to form volatile species ( $\approx 750^\circ\text{C}$ ) to escape from  $\text{ZrO}_2$  support. Correspondingly, the color of the samples evolved from brown to white and the characteristic peaks [(100) and (002)] of  $\text{PdO}$  entirely dispersed. After two-step carbothermal welding, the as-obtained  $\text{Pd}_1@\text{ZrO}_2$  was further pyrolyzed at 900 °C (3 min) in air (Route 1). The colors of the samples were not obviously changed, indicating Pd species was surface-bound by a strong trapping effect between Pd and  $\text{ZrO}_2$ .

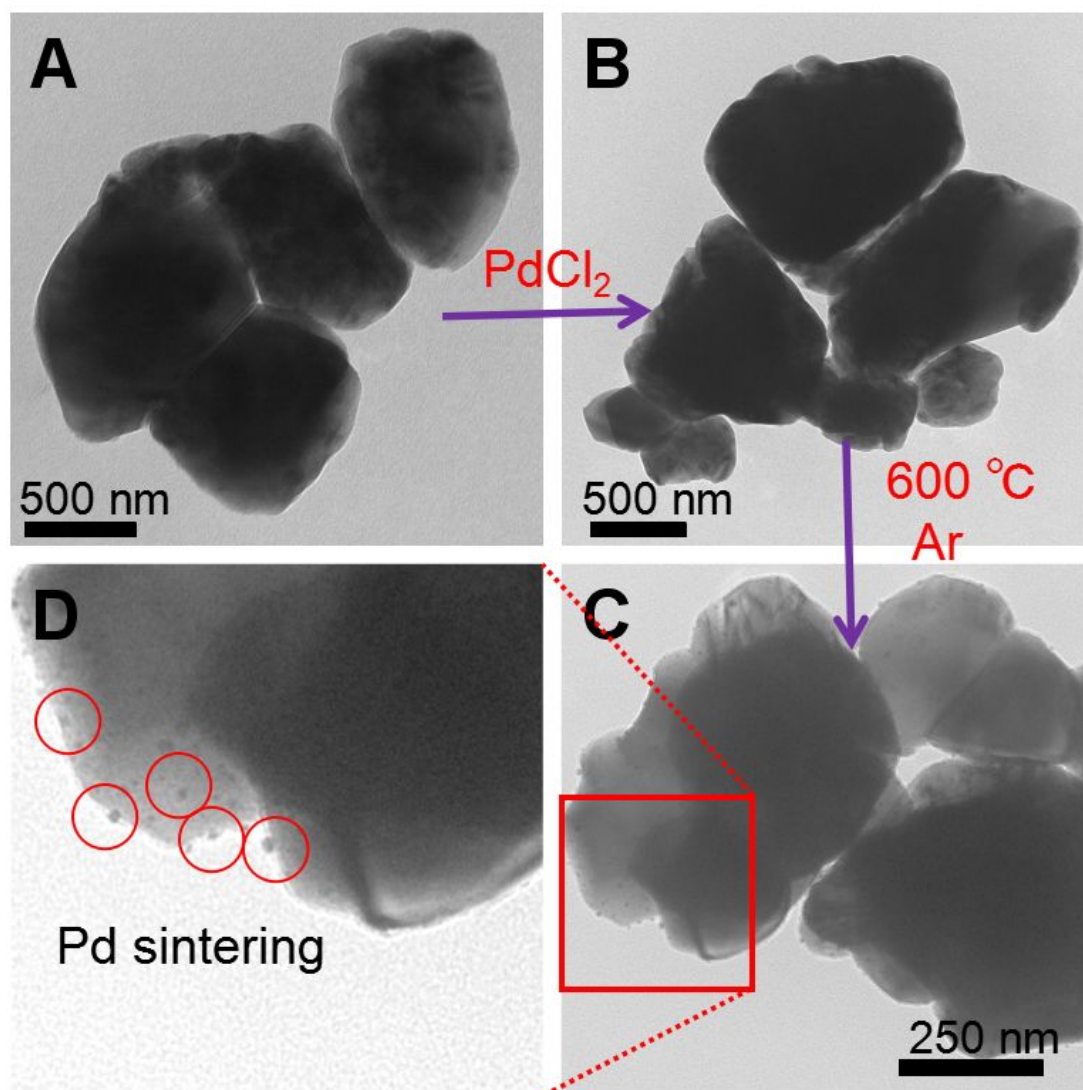

**Fig. S16.** TEM images of (A) commercial ZrO<sub>2</sub>, (B) PdCl<sub>2</sub>/commercial ZrO<sub>2</sub>, (C) Pd nanoparticles/commercial ZrO<sub>2</sub>, and (D) magnified TEM images.

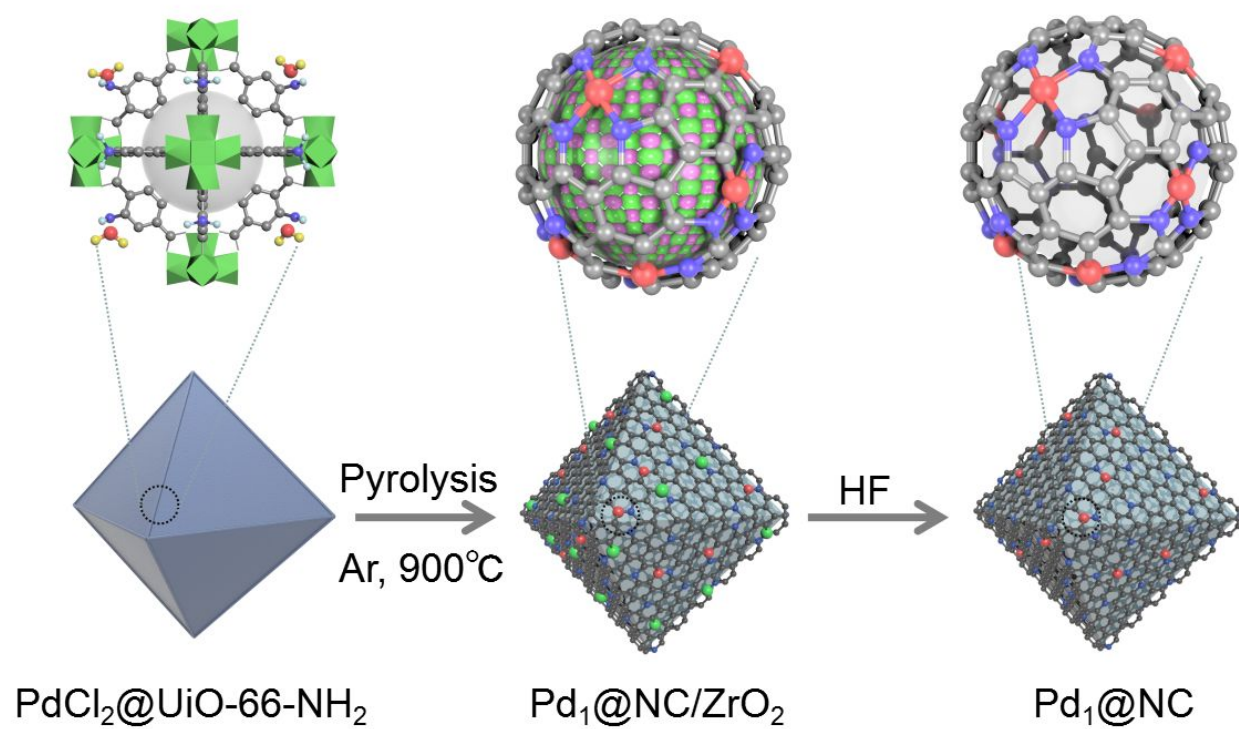

**Fig. S17.** Scheme of the formation of Pd<sub>1</sub>@NC.

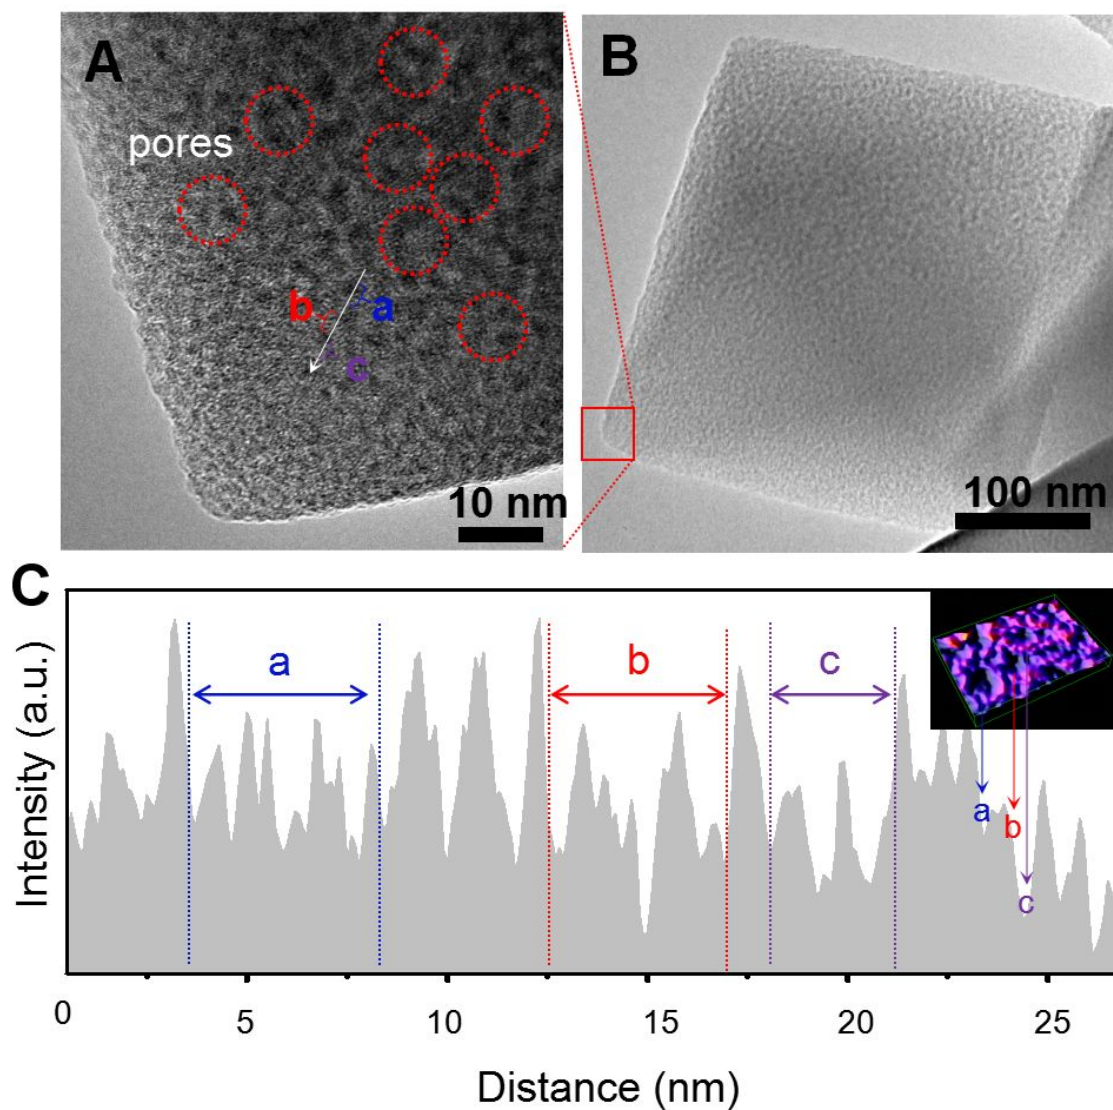

**Fig. S18.** HRTEM image (A) and TEM image (B) of Pd<sub>1</sub>@NC after being removed ZrO<sub>2</sub> via HF etching. (C) Corresponding intensity profiles obtained from the white line in (B), indicating the linker-derived NC skeletons retained its initial shape and the pore derived from ultrasmall ZrO<sub>2</sub> was exposed. The insets was 3D atom-overlapping gaussian-function fitting mapping.

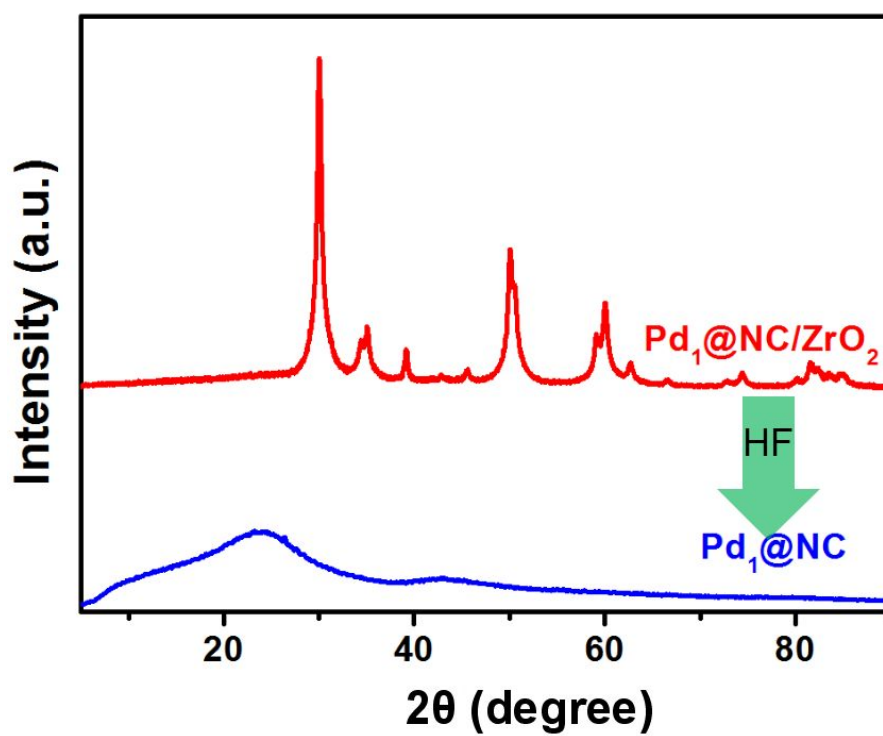

**Fig. S19.** XRD patterns of  $\text{Pd}_1\text{@NC/ZrO}_2$  before and after HF treatment.

As revealed by the XRD pattern, the addition of HF solution could readily etch the inert  $\text{ZrO}_2$  nanoparticles,<sup>[5]</sup> resulting in the formation of Pd single sites ( $\text{Pd}_1\text{@NC}$ ) anchored on an amorphous N-doped carbon skeletons.

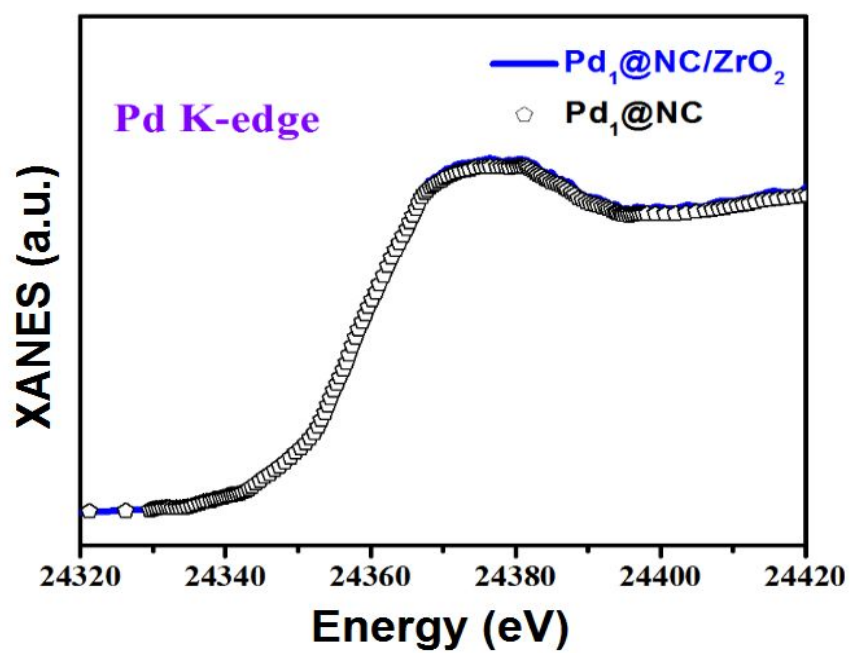

**Fig. S20.** XANES of  $\text{Pd}_1\text{@NC/ZrO}_2$  before and after HF treatment.



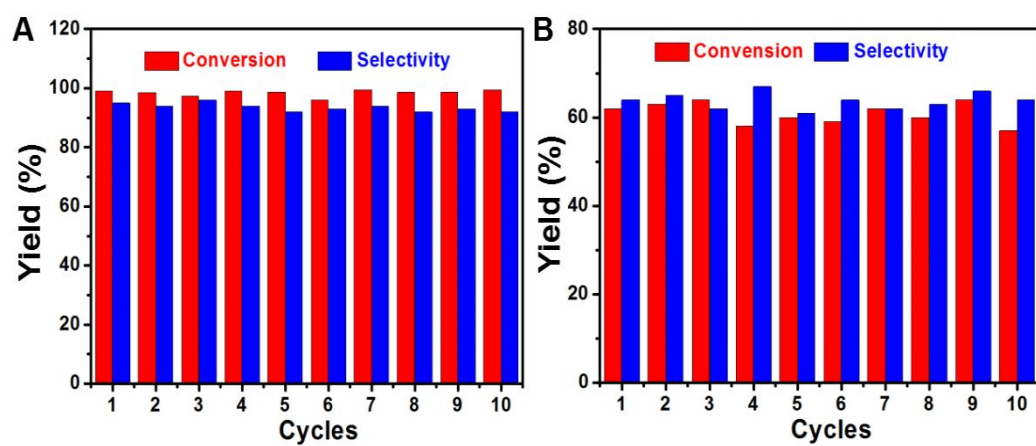

**Fig. S21.** The recyclability of (A) Pd<sub>1</sub>@ZrO<sub>2</sub> and (B) Pd<sub>1</sub>@NC.

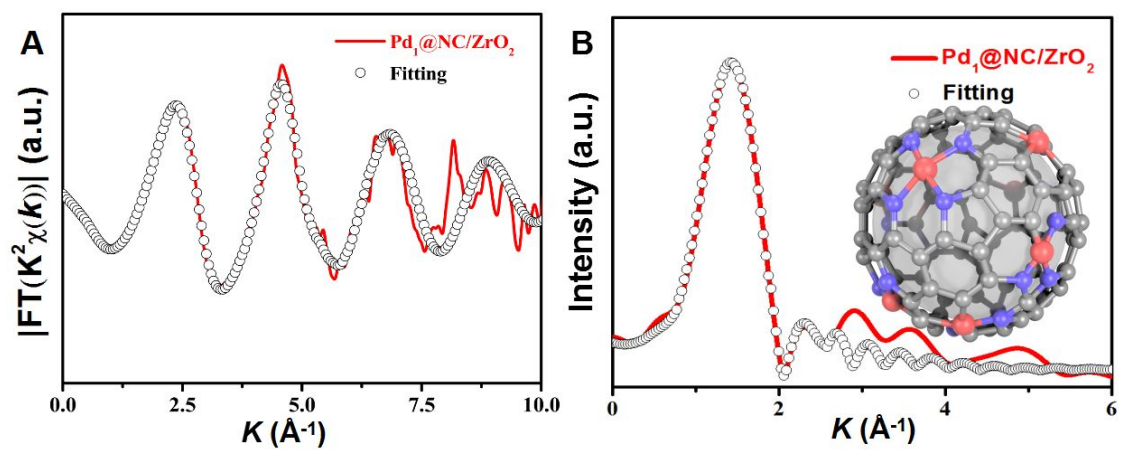

**Fig. S22.** The corresponding (A) inverse and (B) R space FT-EXAFS fitting curves for  $\text{Pd}_1@NC/ZrO_2$ . Inset is the proposed  $\text{Pd}-N_xC_{4-x}$  ( $0 \leq x \leq 4$ ) architectures.



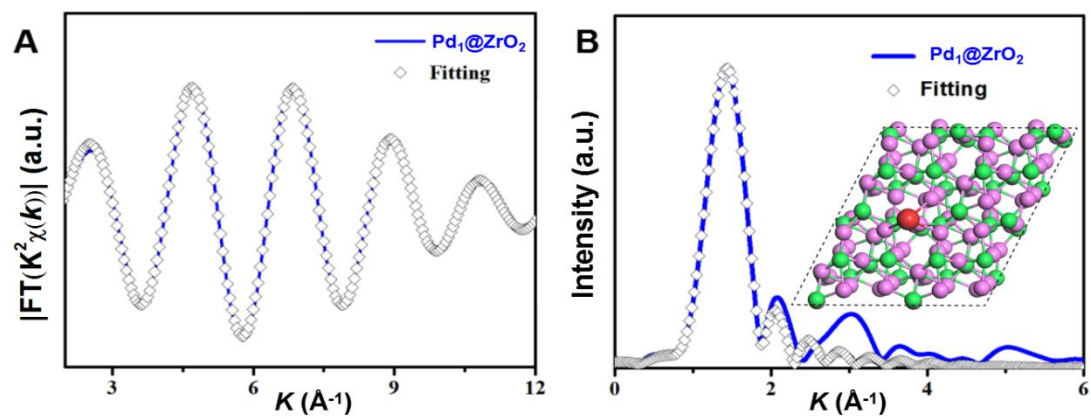

**Fig. S23.** The corresponding (A) inverse and (B) R space FT-EXAFS fitting curves for  $\text{Pd}_1@ZrO_2$ . Inset is the proposed  $\text{Pd-O}_3$  architectures.

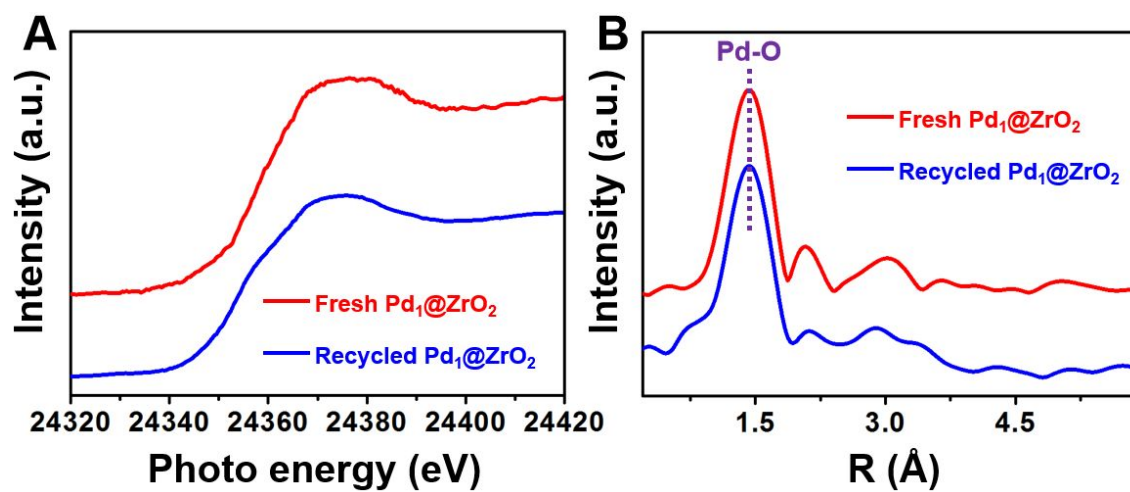

Fig. S24. XANES (A) and FT-EXAFS (B) analysis of  $\text{Pd}_1@\text{ZrO}_2$  after reaction.

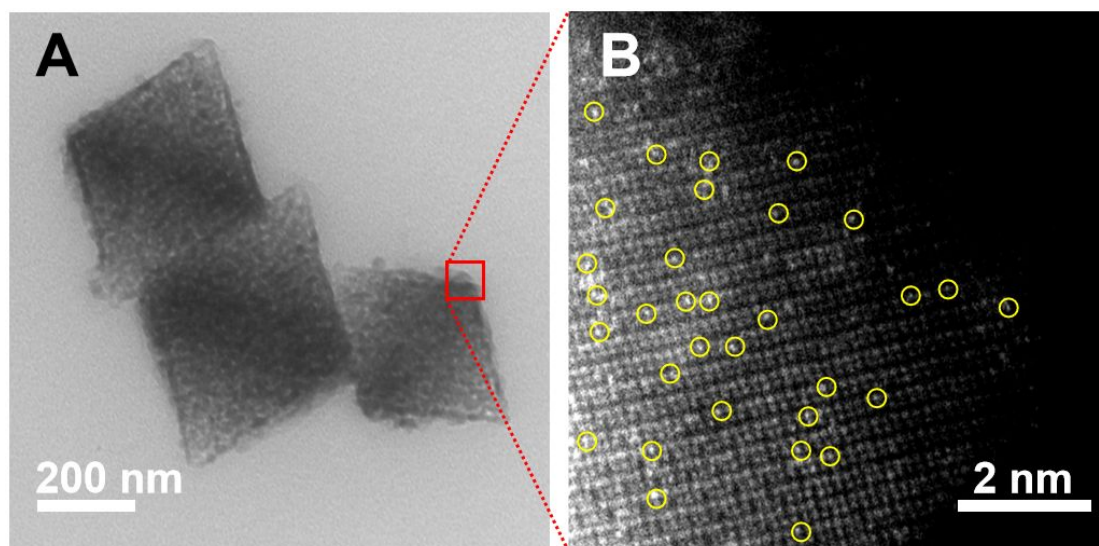

**Fig. S25.** AC HAADF-STEM images of  $\text{Pd}_1@\text{ZrO}_2$  after reaction.

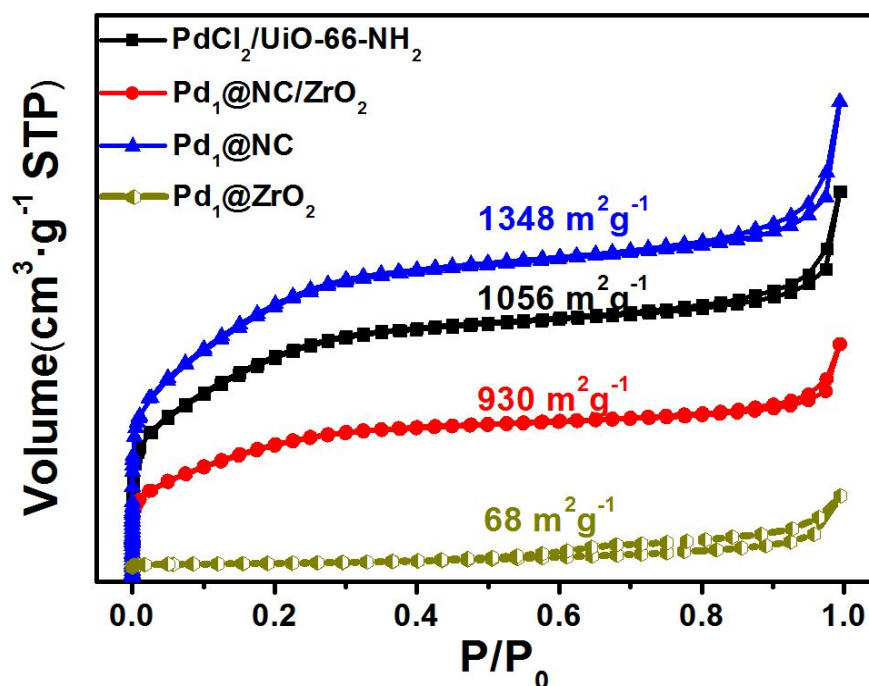

**Fig. S26.** N<sub>2</sub> adsorption and desorption isotherm for PdCl<sub>2</sub>@UiO-66-NH<sub>2</sub>, Pd<sub>1</sub>@NC/ZrO<sub>2</sub>, Pd<sub>1</sub>@NC and Pd<sub>1</sub>@ZrO<sub>2</sub>. The BET specific surface areas of the as-prepared samples were obtained by recording nitrogen adsorption-desorption isotherms at 77 K. The sample were degassed under 300 °C for 360 min (Instrument Model: Autosorb iQ S/N:14716042101). The etching treatment of Pd<sub>1</sub>@NC/ZrO<sub>2</sub> thought HF increased the BET surface areas from 930 to 1348 m<sup>2</sup>g<sup>-1</sup>, indicating the NC skeletons were intact. The NC etching process leads to an obviously decrease of the BET surface areas, further verifying that NC was successful being removed.

**Table S1.** Inductively coupled plasma optical emission spectrometry (ICP-OES) measurements.

| <i>Sample</i>                             | <i>The content of Pd (wt%)</i> |
|-------------------------------------------|--------------------------------|
| Commercial ZrO <sub>2</sub>               | 0                              |
| PdCl <sub>2</sub> @UiO-66-NH <sub>2</sub> | 0.12                           |
| Pd <sub>1</sub> @NC/ZrO <sub>2</sub>      | 0.32                           |
| Pd <sub>1</sub> @NC                       | 0.78                           |
| Pd <sub>1</sub> @ZrO <sub>2</sub>         | 0.44                           |

**Table S2.** EXAFS parameters of Pd<sub>1</sub>@NC/ZrO<sub>2</sub>, Pd<sub>1</sub>@ZrO<sub>2</sub>, and references.

| <i>Sample</i>                        | <i>Path</i> | <i>N</i> | <i>R</i> (Å) | $\sigma^2$<br>(10 <sup>-3</sup> Å <sup>2</sup> ) | $\Delta E_0$<br>(eV) | <i>R-factor</i> |
|--------------------------------------|-------------|----------|--------------|--------------------------------------------------|----------------------|-----------------|
| Pd <sub>1</sub> @NC/ZrO <sub>2</sub> | Pd-N/C      | 4        | 2.00 ± 0.01  | 3.7                                              | -2.21                | 0.004           |
| Pd <sub>1</sub> @ZrO <sub>2</sub>    | Pd-O        | 3        | 2.00 ± 0.02  | 6.1                                              | -1.7                 | 0.0054          |
| Pd foil                              | Pd-Pd       | 12.0*    | 2.74         | 5.4                                              | 3.9                  | 0.001           |

N is the coordination number; R is interatomic distance (the bond length between central atoms and surrounding coordination atoms);  $\sigma^2$  is Debye-Waller factor (a measure of thermal and static disorder in absorber-scatterer distances);  $\Delta E_0$  is edge-energy shift (the difference between the zero kinetic energy value of the sample and that of the theoretical model). *R* factor is used to value the goodness of the fitting. \*This value was fixed during EXAFS fitting, based on the known structure of Pd. Error bounds that characterize the structural parameters obtained by EXAFS spectroscopy were estimated as  $N \pm 20\%$ ;  $R \pm 1\%$ ;  $\sigma^2 \pm 20\%$ ;  $\Delta E_0 \pm 20\%$ .

## References

- [1] Cavka, J. H.; Jakobsen, S.; Olsbye, U.; Guillou, N.; Lamberti, C.; Bordiga, S.; Lillerud, K. P. A new zirconium inorganic building brick forming metal organic frameworks with exceptional stability. *J. Am. Chem. Soc.* **2008**, 130, 13850–13851.
- [2] Wang, X.; Chen, W.; Zhang, L.; Yao, T.; Liu, W.; Lin, Y.; Ju, H.; Dong, J.; Zheng, L.; Yan, W. Uncoordinated amine groups of metal–organic frameworks to anchor single Ru sites as chemoselective catalysts toward the hydrogenation of quinoline. *J. Am. Chem. Soc.* **2017**, 139, 9419–9422.
- [3] Kandiah, M.; Nilsen, M. H.; Usseglio, S.; Jakobsen, S.; Olsbye, U.; Tilset, M.; Larabi, C.; Quadrelli, E. A.; Bonino, F.; Lillerud, K. P. Synthesis and stability of tagged UiO-66 Zr-MOFs. *Chem. Mater.* **2010**, 22, 6632–6640.
- [4] Gnanamoorthi, K.; Balakrishnan, M.; Kumar, E. Ranjith.; Prakash, T.; Mariappan, R. Structural, Optical and Gas Sensing Performance of Pure and Doped ZrO<sub>2</sub>. *J. Adv. Phys.* **2017**, 6, 508–513.
- [5] Yang, J.; Zhang, F.; Wang, X.; He, D.; Wu, G.; Yang, Q.; Hong, X.; Wu, Y.; Li, Y. Porous molybdenum phosphide nano-octahedrons derived from confined phosphorization in UiO-66 for efficient hydrogen evolution. *Angew. Chem. Int. Ed.* **2016**, 55, 12854–12858.
- [6] Wei, S. J.; Li, A.; Liu, J. C.; Li, Z.; Chen, W. X.; Gong, Y.; Zhang, Q. H.; Cheong, W. C.; Wang, Y.; Zheng, L. R.; Xiao, H.; Chen, C.; Wang, D. S.; Peng, Q.; Gu, L.; Han, X. D.; Li, J.; Li, Y. D. Direct observation of noble metal nanoparticles transforming to thermally stable single atoms. *Nat. Nanotechnol.* **2018**, 13, 856–861.
